# Supplementary material for: Impact of a rapid high‐sensitivity troponin pathway on patient flow in an urban emergency department
Source: PubMed Central journal article supplement — J Am Coll Emerg Physicians Open. 2022 May 5;3(3):e12739. doi: 10.1002/emp2.12739 (PMC9071237; doi:10.1002/emp2.12739), 2022-05-05
Supplement: EMP2-3-e12739-s002.pdf [file EMP2-3-e12739-s002.pdf]

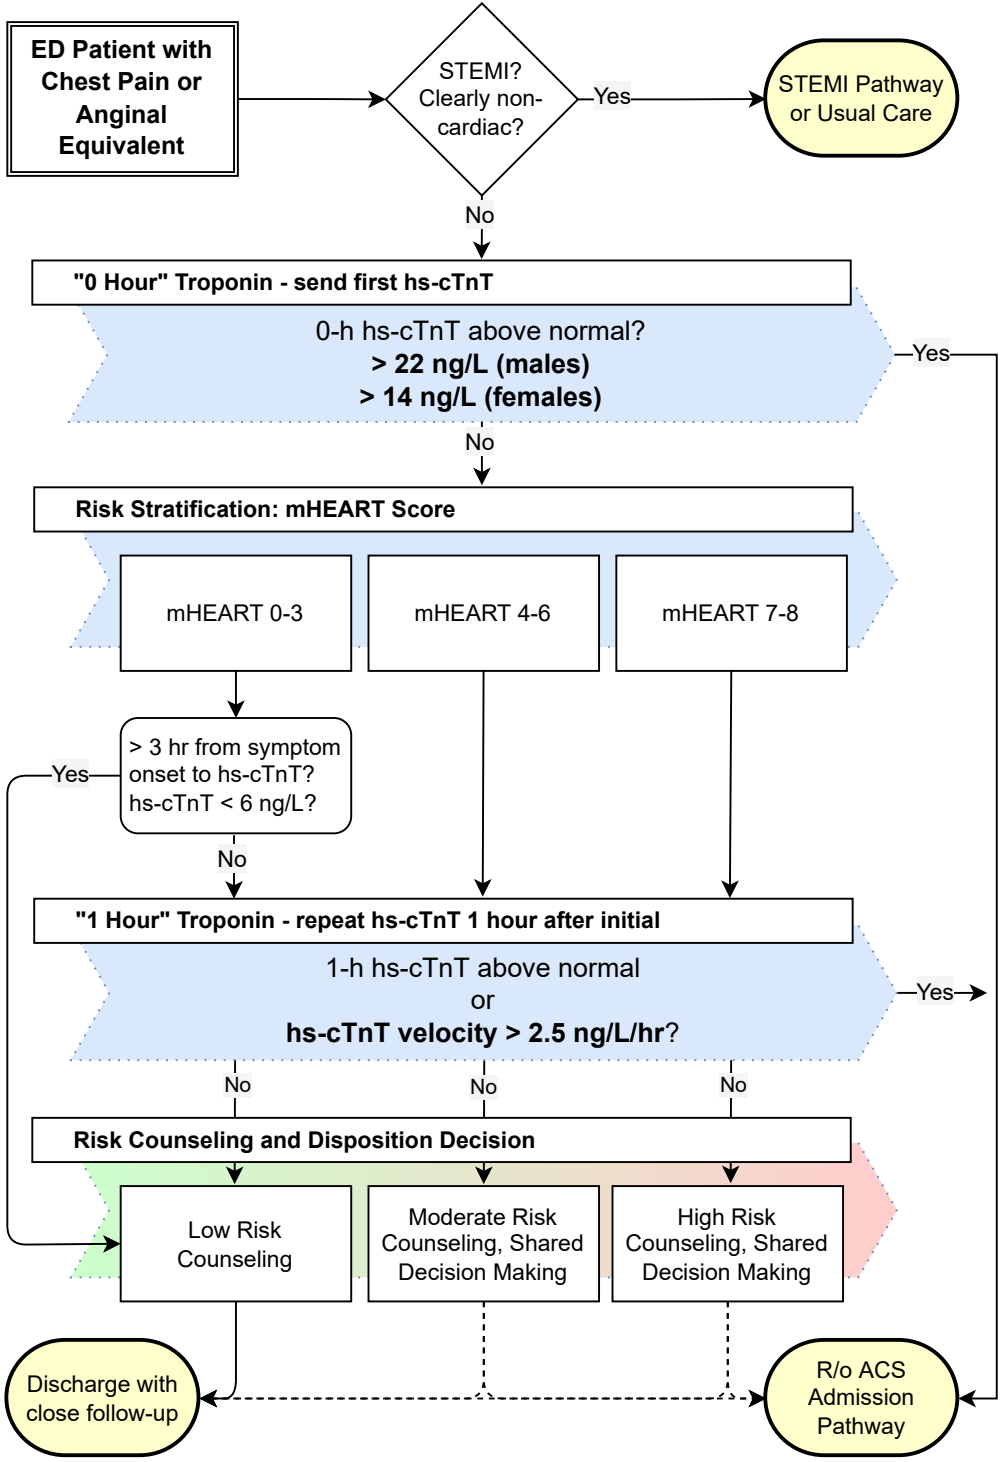

**ED Patient with Chest Pain or Anginal Equivalent**

STEMI?  
Clearly non-cardiac?

STEMI Pathway  
or Usual Care

**"0 Hour" Troponin - send first hs-cTnT**

0-h hs-cTnT above normal?  
**> 22 ng/L (males)**  
**> 14 ng/L (females)**

**Risk Stratification: mHEART Score**

mHEART 0-3

mHEART 4-6

mHEART 7-8

> 3 hr from symptom onset to hs-cTnT?  
hs-cTnT < 6 ng/L?

**"1 Hour" Troponin - repeat hs-cTnT 1 hour after initial**

1-h hs-cTnT above normal  
or  
**hs-cTnT velocity > 2.5 ng/L/hr?**

**Risk Counseling and Disposition Decision**

Low Risk Counseling

Moderate Risk Counseling, Shared Decision Making

High Risk Counseling, Shared Decision Making

Discharge with close follow-up

R/o ACS Admission Pathway
