# Supplementary material for: Impact of a rapid high‐sensitivity troponin pathway on patient flow in an urban emergency department
Source: PubMed Central journal article supplement — J Am Coll Emerg Physicians Open. 2022 May 5;3(3):e12739. doi: 10.1002/emp2.12739 (PMC9071237; doi:10.1002/emp2.12739), 2022-05-05
Supplement: EMP2-3-e12739-s003.pdf [file EMP2-3-e12739-s003.pdf]

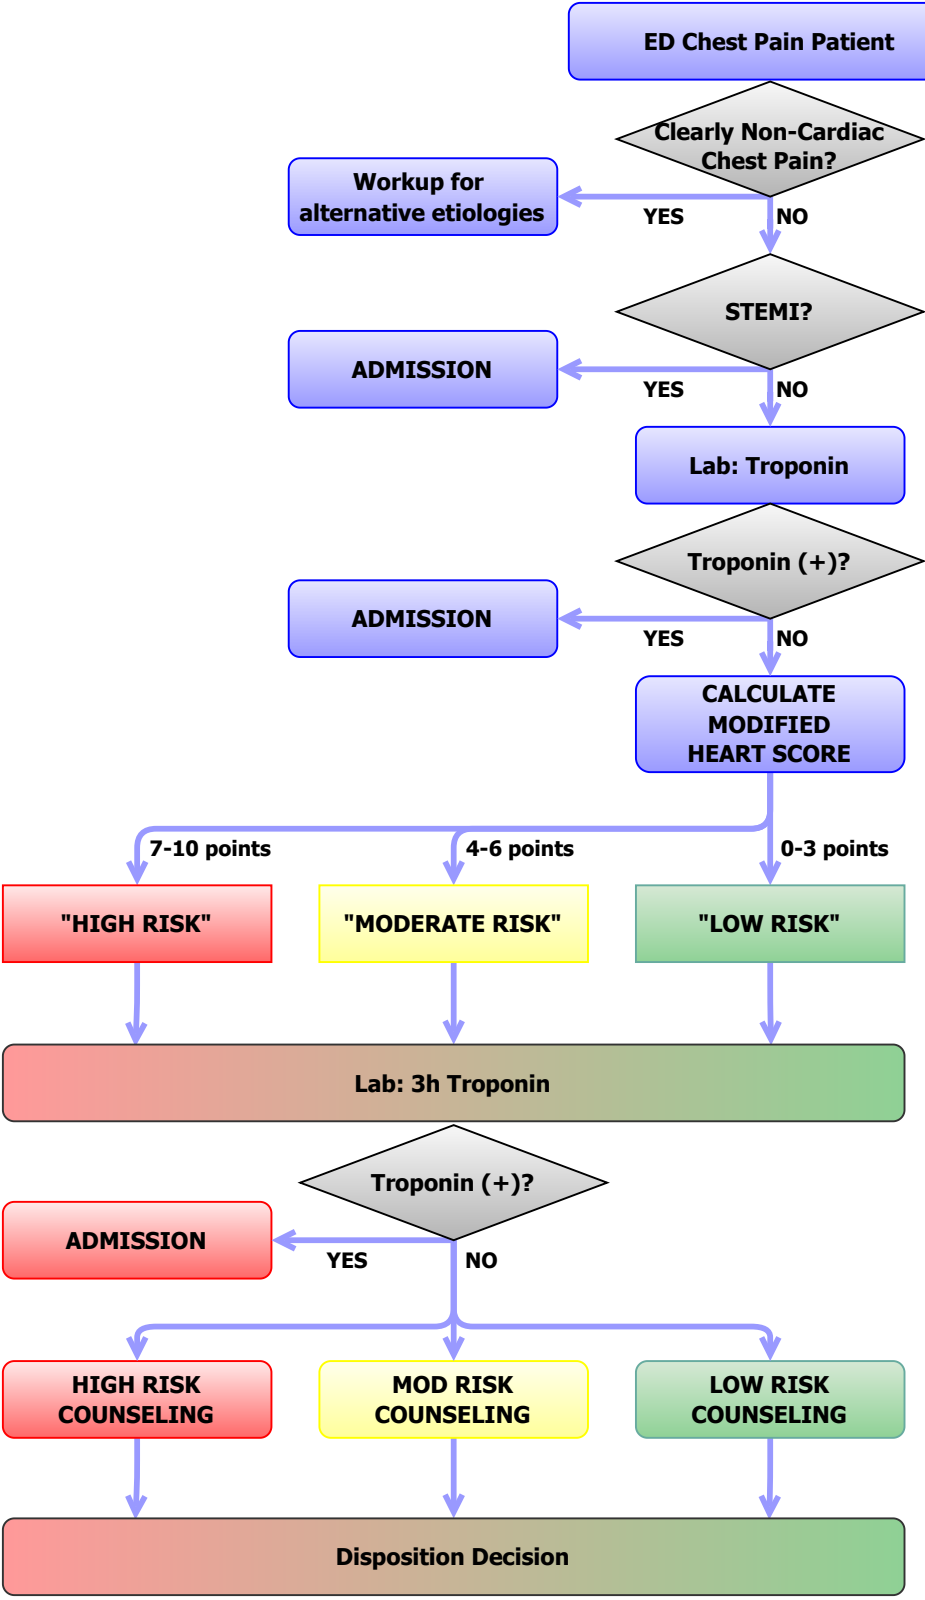

**MODIFIED HEART SCORE:**

|          |                           |          |
|----------|---------------------------|----------|
| History: | highly suspicious         | 2 points |
|          | moderately suspicious     | 1 point  |
|          | slightly suspicious       | 0 points |
| EKG:     | significant ST depression | 2 points |
|          | non-specific change       | 1 point  |
|          | normal                    | 0 points |
| Age:     | ≥65                       | 2 points |
|          | 45-64                     | 1 point  |
|          | <45                       | 0 points |
| RF:      | ≥3 or hx CAD              | 2 points |
|          | 1-2                       | 1 point  |
|          | none known                | 0 points |
| Trop:    | above normal limit        | 4 points |
|          | indeterminate range       | 1 point  |
|          | undetectable              | 0 points |

**HEART CHEST PAIN HISTORY:**

- Localization
- Pattern
- Onset and duration
- Relation with exercise, stress or cold
- Reaction to sublingual nitrates
- Concomitant symptoms

**SUSPICION:**

**SLIGHT:** NO historical elements suggesting cardiac CP

**MODERATE:** SOME historical elements suggesting cardiac CP  
PLUS SOME historical elements suggesting non-cardiac CP

**HIGH:** PRIMARILY historical elements suggesting cardiac CP

**HEART RISK FACTORS:**

|                |                             |
|----------------|-----------------------------|
| DM             | - currently treated         |
| Smoker         | - current or recent (<1 mo) |
| HTN            | - previously diagnosed      |
| Hyperlipidemia | - previously diagnosed      |
| FH of CAD      |                             |
| Obesity        | - BMI ≥ 30                  |
